## CORRECTION

## Correction: Global adoption of 6-month drug-resistant TB regimens: Projected uptake by 2026

The *PLOS ONE* Staff

## Notice of Republication

This article was republished on January 22, 2024, to correct error in the data availability statement: Personal email addresses of multiple personnel were erroneously provided in the data availability statement. An incorrect version of the S1 File was also published in error. The publisher apologises for these errors. Please download this article again to view the correct version.

## Reference

1. Gupta A, Juneja S, Babawale V, Rustam Majidovich N, Ndjeka N, Thi Mai Nguyen P, et al. (2024) Global adoption of 6-month drug-resistant TB regimens: Projected uptake by 2026. *PLoS ONE* 19(1): e0296448. <https://doi.org/10.1371/journal.pone.0296448> PMID: 38180980

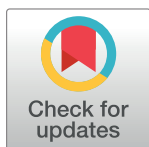

## OPEN ACCESS

**Citation:** The *PLOS ONE* Staff (2024) Correction: Global adoption of 6-month drug-resistant TB regimens: Projected uptake by 2026. *PLoS ONE* 19(1): e0298250. <https://doi.org/10.1371/journal.pone.0298250>

**Published:** January 31, 2024

**Copyright:** © 2024 The PLOS ONE Staff. This is an open access article distributed under the terms of the [Creative Commons Attribution License](#), which permits unrestricted use, distribution, and reproduction in any medium, provided the original author and source are credited.
